# Supplementary material
Source: PubMed Central journal article supplement (PMC4794660)

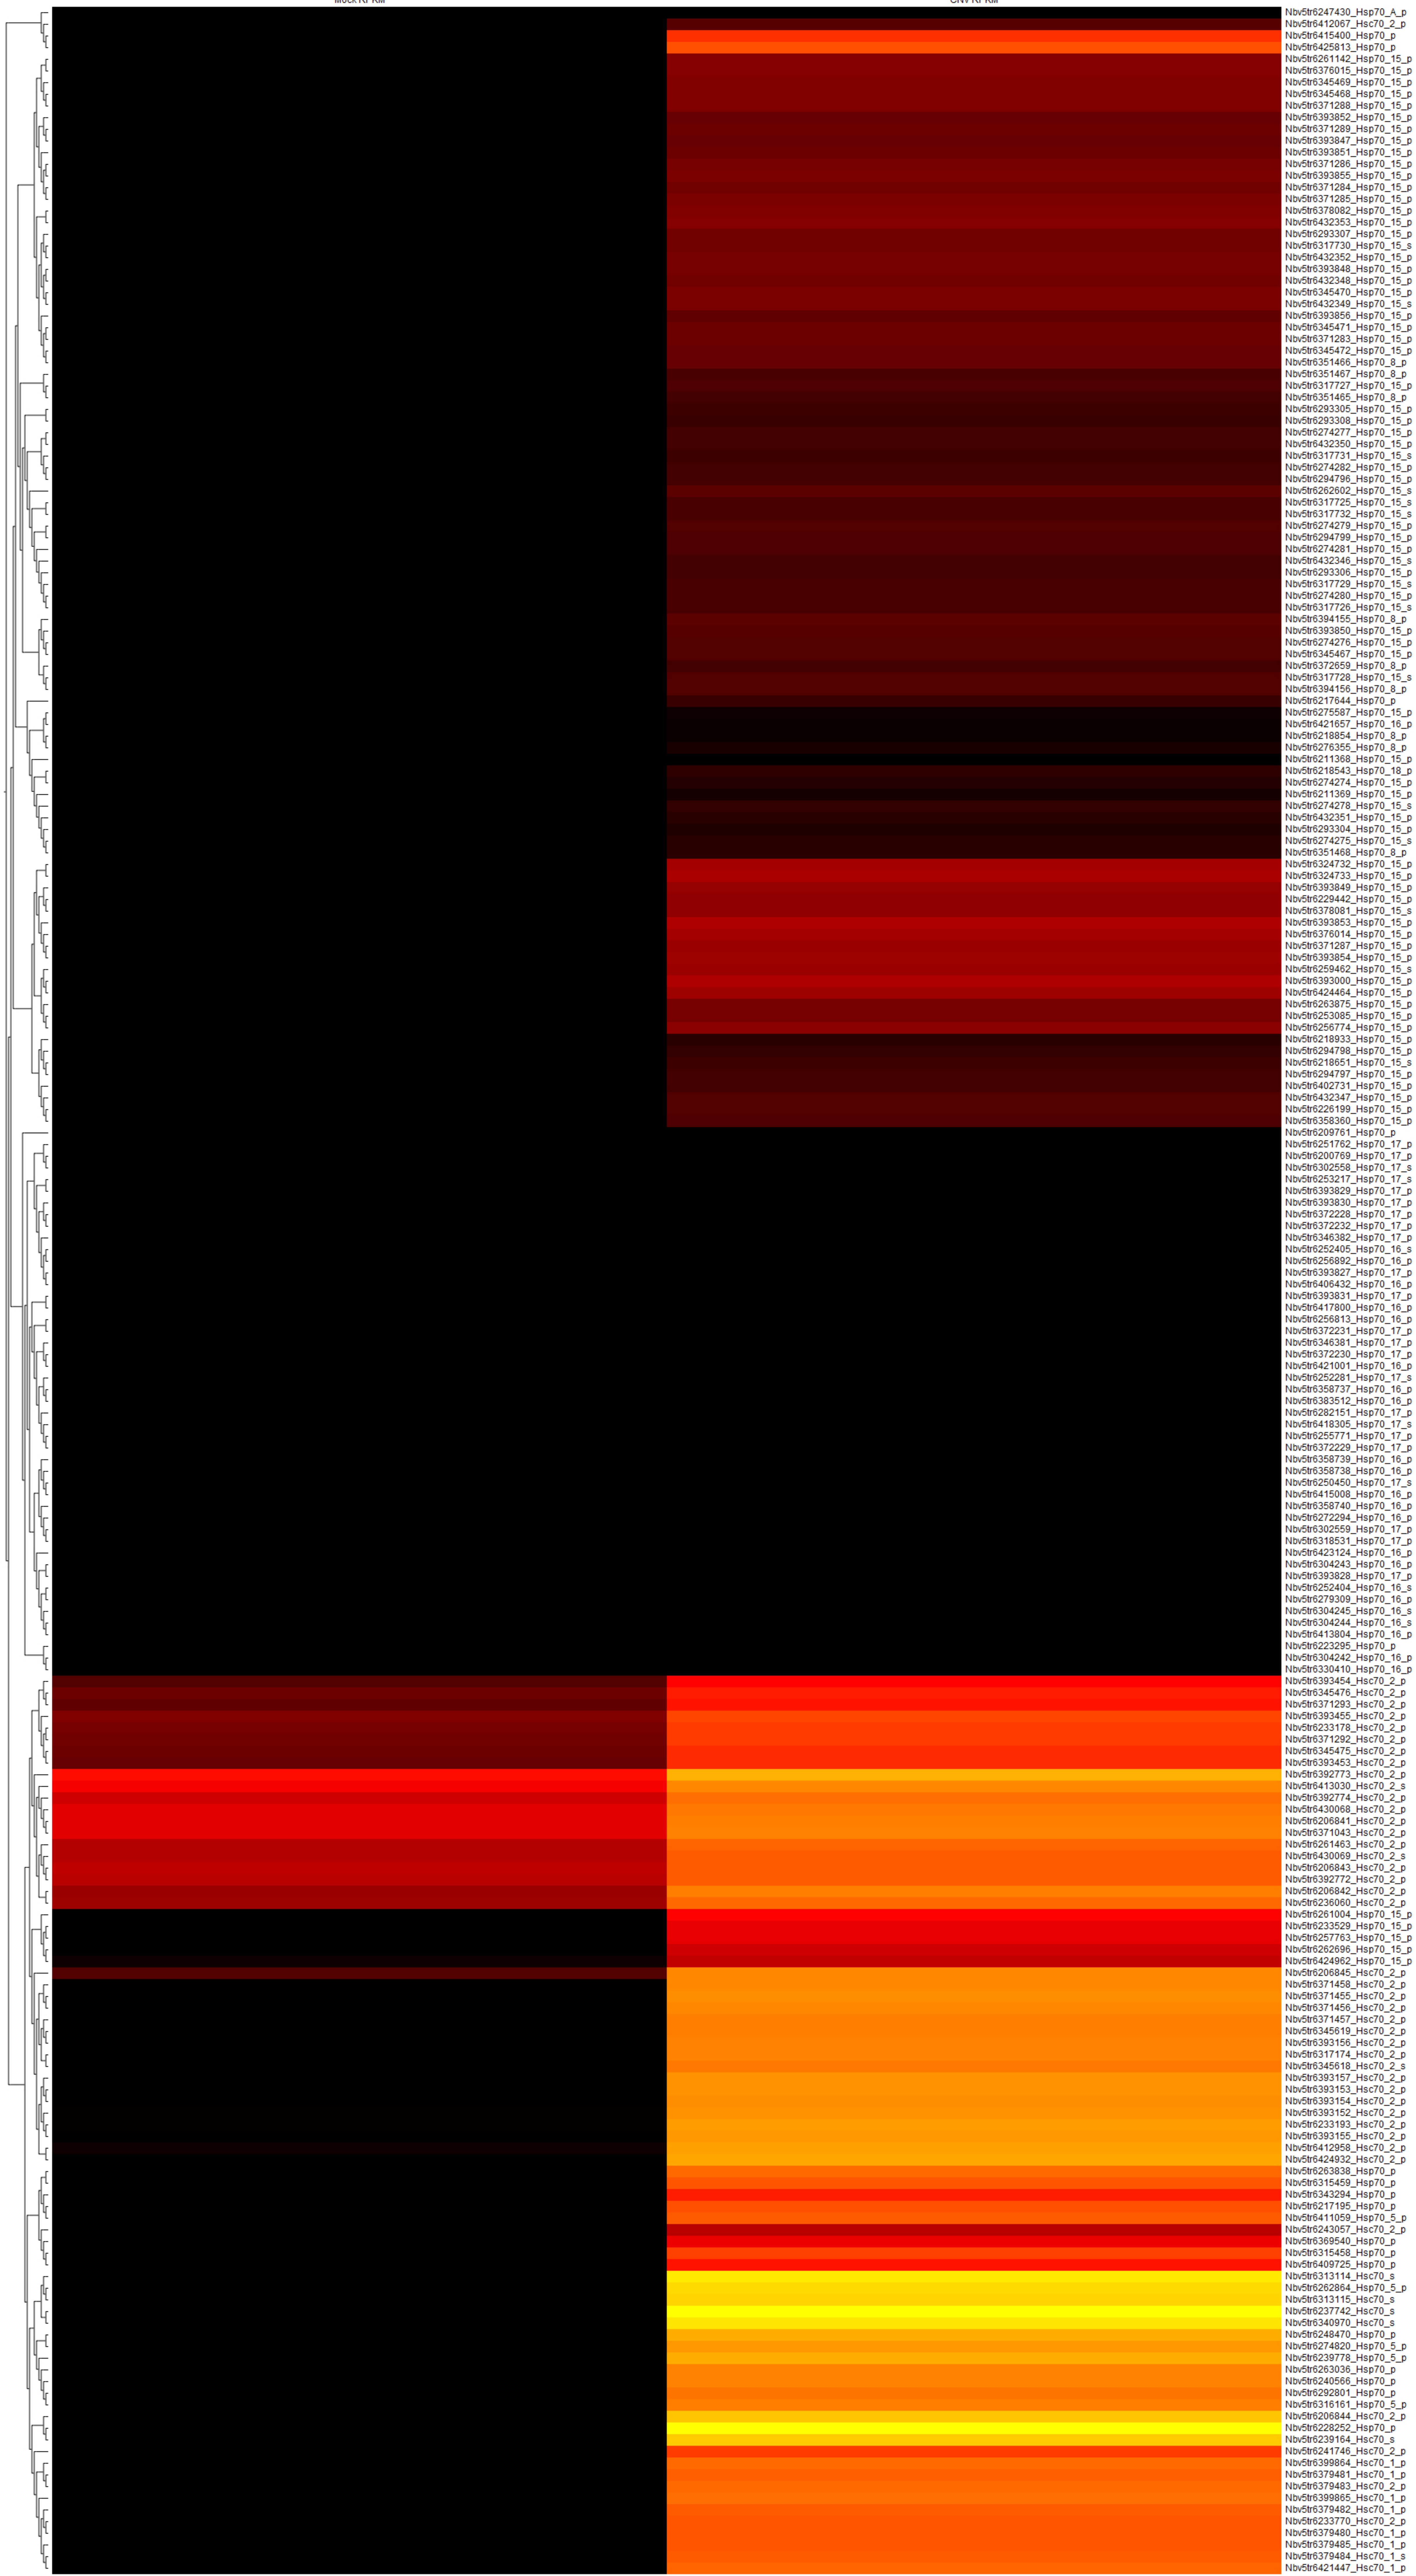

Supplement: JVI.02833-15_zjv999091414so2.pdf [file JVI.02833-15_zjv999091414so2.pdf]
